# Supplementary material
Source: bioRxiv or medRxiv preprint supplement (https://www.biorxiv.org/highwire/filestream/135150/field_highwire_adjunct_files/0/408914-1.pdf)
Supplement: Supplementary file [file 408914-1.pdf]

## SUPPLEMENTAL MATERIAL

**Table S1. *E. faecium* genomes used for conservation analysis.**

| <b>Strain name</b> | <b>Clade</b> | <b>Category</b>             | <b>Reference</b> |
|--------------------|--------------|-----------------------------|------------------|
| EnGen0003          | B            | non-hospitalized individual | [Lebreton, 2013] |
| com12              | B            | non-hospitalized individual | [Lebreton, 2013] |
| EnGen0056          | B            | clinical isolate            | [Lebreton, 2013] |
| EnGen0047          | B            | clinical isolate            | [Lebreton, 2013] |
| 1141733            | B            | clinical isolate            | [Lebreton, 2013] |
| EnGen0038          | B            | clinical isolate            | [Lebreton, 2013] |
| com12              | B            | non-hospitalized individual | [Lebreton, 2013] |
| EnGen0042          | B            | hospital feces              | [Lebreton, 2013] |
| E980               | B            | non-hospitalized individual | [Lebreton, 2013] |
| EnGen0033          | B            | clinical isolate            | [Lebreton, 2013] |
| EnGen0015          | B            | non-hospitalized individual | [Lebreton, 2013] |
| EnGen0028          | B            | other                       | [Lebreton, 2013] |
| LCT-EF90           | B            | other                       | [Lebreton, 2013] |
| EnGen0029          | B            | other                       | [Lebreton, 2013] |
| EnGen0026          | B            | clinical isolate            | [Lebreton, 2013] |
| 1231408            | Rec          | clinical isolate            | [Lebreton, 2013] |
| EnGe0002           | Rec          | hospital surveillance       | [Lebreton, 2013] |
| EnGen0013          | A1           | clinical isolate            | [Lebreton, 2013] |
| EnGen0034          | A1           | clinical isolate            | [Lebreton, 2013] |
| 1230933            | A1           | clinical isolate            | [Lebreton, 2013] |
| EnGen0046          | A1           | clinical isolate            | [Lebreton, 2013] |
| U0317              | A1           | clinical isolate            | [Lebreton, 2013] |
| E4452              | A1           | animal                      | [Lebreton, 2013] |
| EnGen0054          | A1           | clinical isolate            | [Lebreton, 2013] |
| 1231502            | A1           | clinical isolate            | [Lebreton, 2013] |
| EnGen0049          | A1           | hospital surveillance       | [Lebreton, 2013] |
| EnGen0045          | A1           | hospital surveillance       | [Lebreton, 2013] |
| EnGen0016          | A1           | hospital unknown            | [Lebreton, 2013] |
| EnGen0036          | A1           | clinical isolate            | [Lebreton, 2013] |
| EnGen0030          | A1           | clinical isolate            | [Lebreton, 2013] |
| E4453              | A1           | animal                      | [Lebreton, 2013] |
| EnGen0051          | A1           | hospital outbreak           | [Lebreton, 2013] |
| EnGen0050          | A1           | clinical isolate            | [Lebreton, 2013] |
| 1231410            | A1           | clinical isolate            | [Lebreton, 2013] |
| Aus0004            | A1           | clinical isolate            | [Lebreton, 2013] |
| C68                | A1           | hospital outbreak           | [Lebreton, 2013] |
| E1162              | A1           | clinical isolate            | [Lebreton, 2013] |

---

|           |    |                             |                  |
|-----------|----|-----------------------------|------------------|
| EnGen0057 | A1 | animal                      | [Lebreton, 2013] |
| EnGen0018 | A2 | animal                      | [Lebreton, 2013] |
| EnGen0031 | A2 | clinical isolate            | [Lebreton, 2013] |
| EnGen0007 | A2 | animal                      | [Lebreton, 2013] |
| EnGen0017 | A2 | non-hospitalized individual | [Lebreton, 2013] |
| EnGen0025 | A2 | clinical isolate            | [Lebreton, 2013] |
| EnGen0009 | A2 | animal                      | [Lebreton, 2013] |
| E1071     | A2 | hospital surveillance       | [Lebreton, 2013] |
| EnGen0032 | A2 | animal                      | [Lebreton, 2013] |
| D344SRF   | A2 | other                       | [Lebreton, 2013] |
| TC6       | A2 | other                       | [Lebreton, 2013] |
| EnGen0011 | A2 | clinical isolate            | [Lebreton, 2013] |
| E1636     | A2 | clinical isolate            | [Lebreton, 2013] |
| EnGen0010 | A2 | animal                      | [Lebreton, 2013] |
| EnGen0048 | A2 | animal                      | [Lebreton, 2013] |
| EnGen0005 | A2 | animal                      | [Lebreton, 2013] |
| EnGen0022 | A2 | animal                      | [Lebreton, 2013] |
| EnGen0043 | A2 | animal                      | [Lebreton, 2013] |
| EnGen0027 | A2 | clinical isolate            | [Lebreton, 2013] |
| EnGen0001 | A2 | animal                      | [Lebreton, 2013] |
| E1679     | A2 | hospital outbreak           | [Lebreton, 2013] |
| EnGen0024 | A2 | clinical isolate            | [Lebreton, 2013] |
| EnGen0020 | A2 | animal                      | [Lebreton, 2013] |
| EnGen0012 | A2 | clinical isolate            | [Lebreton, 2013] |
| EnGen0044 | A2 | animal                      | [Lebreton, 2013] |
| 1231501   | A2 | clinical isolate            | [Lebreton, 2013] |
| EnGen0004 | A2 | clinical isolate            | [Lebreton, 2013] |
| EnGen0052 | A2 | clinical isolate            | [Lebreton, 2013] |
| EnGen0039 | A2 | other                       | [Lebreton, 2013] |
| EnGen0019 | A2 | animal                      | [Lebreton, 2013] |
| EnGen0040 | A2 | other                       | [Lebreton, 2013] |
| EnGen0008 | A2 | animal                      | [Lebreton, 2013] |
| EnGen0021 | A2 | hospital surveillance       | [Lebreton, 2013] |
| E1039     | A2 | non-hospitalized individual | [Lebreton, 2013] |
| EnGen0014 | A2 | animal                      | [Lebreton, 2013] |
| EnGen0035 | A2 | clinical isolate            | [Lebreton, 2013] |

---

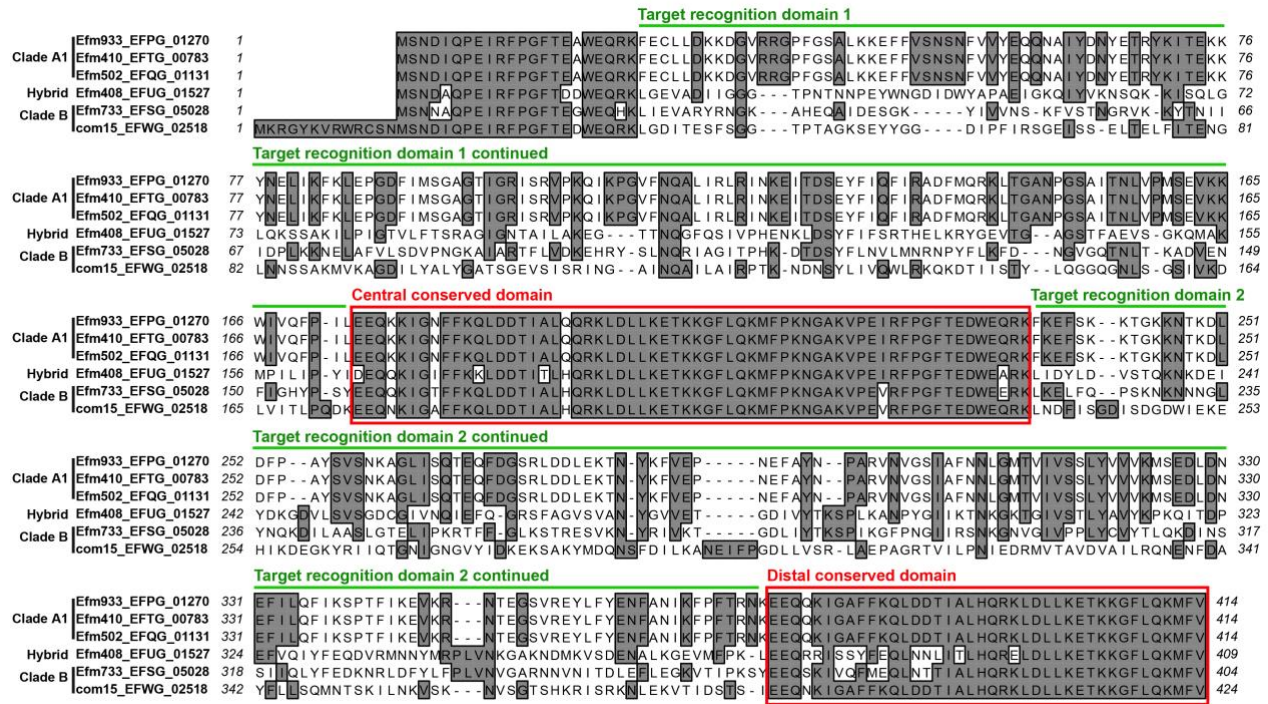

**Figure S1. Multiple sequence alignment of S subunits.** The protein sequences of predicted S subunits from 6 (out of 8) representative *E. faecium* genomes were aligned using MacVector. The multiple sequence alignment is shown here. Central and distal conserved domain was identified based on sequence homology and labeled in red. The target recognition domains were interpreted based on conserved domains as labeled in green.

|          |           | hscS: EFQG_0113 | hscR: EFQG_0113 | hscM: EFQG_0113 |
|----------|-----------|-----------------|-----------------|-----------------|
| Clade A1 | EnGen0054 |                 |                 |                 |
| Clade A1 | EnGen0030 |                 |                 |                 |
| Clade A1 | EnGen0036 |                 |                 |                 |
| Clade A1 | EnGen0057 |                 |                 |                 |
| Clade A1 | Aus0004   |                 |                 |                 |
| Clade A1 | E4452     |                 |                 |                 |
| Clade A1 | E4453     |                 |                 |                 |
| Clade A1 | U0317     |                 |                 |                 |
| Clade A1 | EnGen0046 |                 |                 |                 |
| Clade A1 | 1230933   |                 |                 |                 |
| Clade A1 | 1231410   |                 |                 |                 |
| Clade A1 | 1231502   |                 |                 |                 |
| Clade A1 | C68       |                 |                 |                 |
| Clade A1 | E1162     |                 |                 |                 |
| Clade A1 | EnGen0013 |                 |                 |                 |
| Clade A1 | EnGen0016 |                 |                 |                 |
| Clade A1 | EnGen0034 |                 |                 |                 |
| Clade A1 | EnGen0045 |                 |                 |                 |
| Clade A1 | EnGen0049 |                 |                 |                 |
| Clade A1 | EnGen0050 |                 |                 |                 |
| Clade A1 | EnGen0051 |                 |                 |                 |
| Rec      | EnGen0002 |                 |                 |                 |
| Rec      | 1231408   |                 |                 |                 |
| Clade A2 | 1231501   |                 |                 |                 |
| Clade A2 | D344SRF   |                 |                 |                 |
| Clade A2 | E1039     |                 |                 |                 |
| Clade A2 | E1071     |                 |                 |                 |
| Clade A2 | E1636     |                 |                 |                 |
| Clade A2 | E1679     |                 |                 |                 |
| Clade A2 | EnGen0001 |                 |                 |                 |
| Clade A2 | EnGen0004 |                 |                 |                 |
| Clade A2 | EnGen0005 |                 |                 |                 |
| Clade A2 | EnGen0007 |                 |                 |                 |
| Clade A2 | EnGen0008 |                 |                 |                 |
| Clade A2 | EnGen0009 |                 |                 |                 |
| Clade A2 | EnGen0010 |                 |                 |                 |
| Clade A2 | EnGen0011 |                 |                 |                 |
| Clade A2 | EnGen0012 |                 |                 |                 |
| Clade A2 | EnGen0014 |                 |                 |                 |
| Clade A2 | EnGen0017 |                 |                 |                 |
| Clade A2 | EnGen0018 |                 |                 |                 |
| Clade A2 | EnGen0019 |                 |                 |                 |
| Clade A2 | EnGen0020 |                 |                 |                 |
| Clade A2 | EnGen0021 |                 |                 |                 |
| Clade A2 | EnGen0022 |                 |                 |                 |
| Clade A2 | EnGen0024 |                 |                 |                 |
| Clade A2 | EnGen0025 |                 |                 |                 |
| Clade A2 | EnGen0027 |                 |                 |                 |
| Clade A2 | EnGen0031 |                 |                 |                 |
| Clade A2 | EnGen0032 |                 |                 |                 |
| Clade A2 | EnGen0035 |                 |                 |                 |
| Clade A2 | EnGen0039 |                 |                 |                 |
| Clade A2 | EnGen0040 |                 |                 |                 |
| Clade A2 | EnGen0043 |                 |                 |                 |
| Clade A2 | EnGen0044 |                 |                 |                 |
| Clade A2 | EnGen0048 |                 |                 |                 |
| Clade A2 | EnGen0052 |                 |                 |                 |
| Clade A2 | TC6       |                 |                 |                 |
| Clade B  | 1141733   |                 |                 |                 |
| Clade B  | com12     |                 |                 |                 |
| Clade B  | com15     |                 |                 |                 |
| Clade B  | E980      |                 |                 |                 |
| Clade B  | EnGen0003 |                 |                 |                 |
| Clade B  | EnGen0015 |                 |                 |                 |
| Clade B  | EnGen0026 |                 |                 |                 |
| Clade B  | EnGen0028 |                 |                 |                 |
| Clade B  | EnGen0029 |                 |                 |                 |
| Clade B  | EnGen0033 |                 |                 |                 |
| Clade B  | EnGen0038 |                 |                 |                 |
| Clade B  | EnGen0042 |                 |                 |                 |
| Clade B  | EnGen0047 |                 |                 |                 |
| Clade B  | EnGen0056 |                 |                 |                 |
| Clade B  | LCT-EF90  |                 |                 |                 |

a).



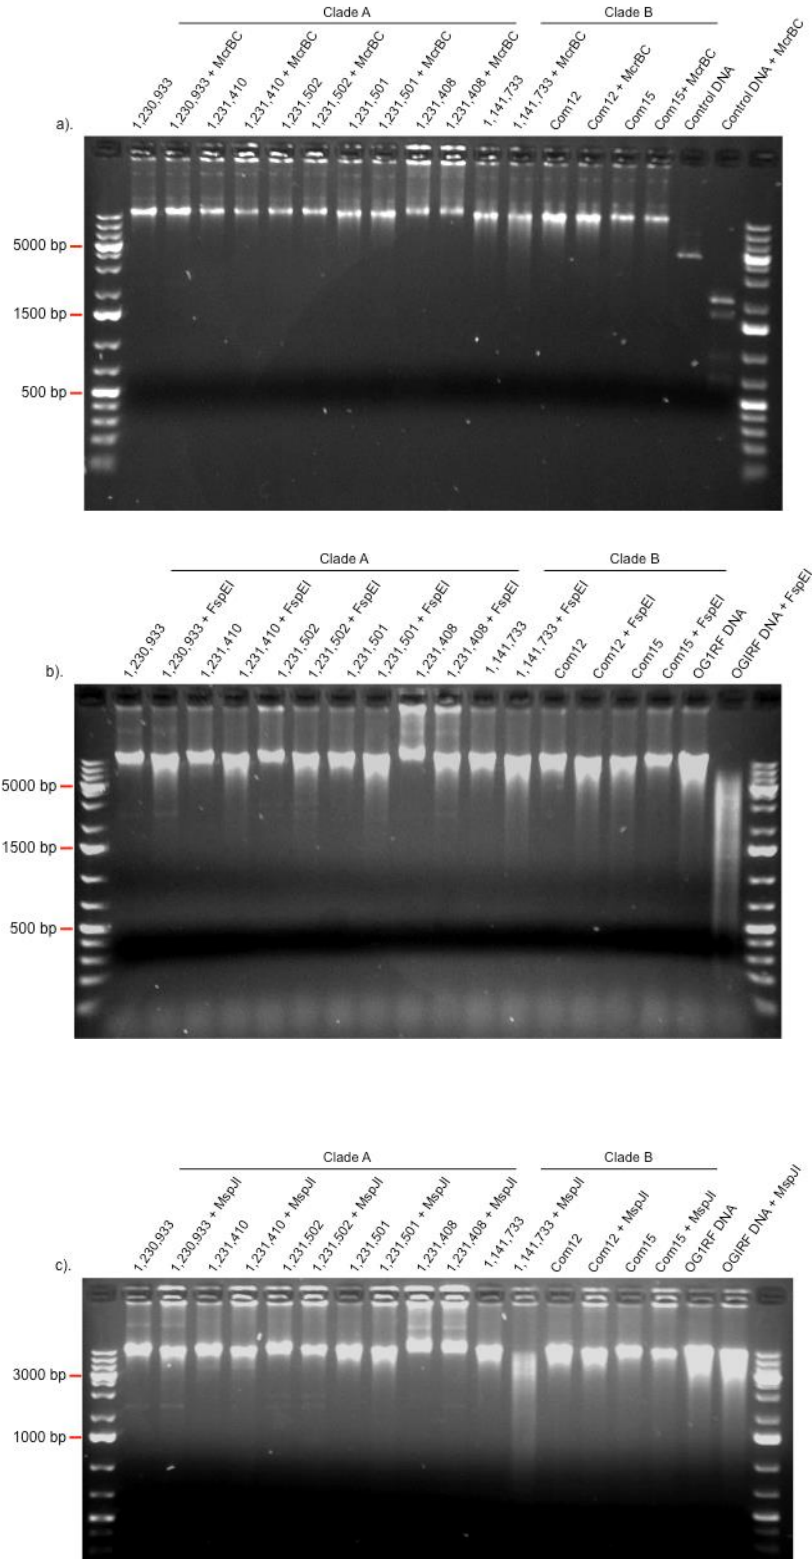

**Figure S3. REase protection assays of representative *E. faecium* genomes.** (a) McrBC, recognizing (G/A)<sup>m</sup>C. Control DNA was provided by NEB and expected to be digested only in the presence of McrBC. (b) FspEI, recognizing fully methylated CpG or CHG (H=A/C/T). OG1RF

gDNA was used as positive control. OG1RF possesses m5C modification within G<sup>m5C</sup>(A/T)GC motif hence its gDNA is expected to be digested by FspEI. (c) MspJI, recognizing mC<sup>m</sup>NNR. OG1RF gDNA was used as negative control and no digestion was expected.

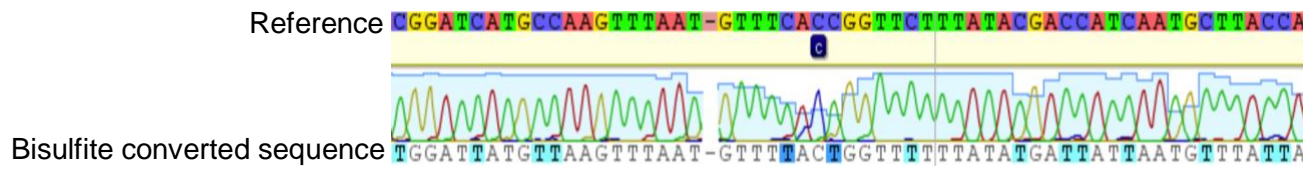

**Figure S4. Targeted bisulfite sequencing of Efm733.** Sequencing of Efm733 gDNA after bisulfite conversion. The marked C was protected from conversion, which indicates it has been modified by m5C methylation at 5'-R<sup>m</sup>CCGGY-3'.
